# Supplementary material for: Synthesis, structure and photoluminescence properties of Ca2LuHf2(AlO4)3:Ce3+, a novel garnet-based cyan light-emitting phosphor
Source: Royal Society of Chemistry journal article supplement (doi:10.1039/c6tc03933b), 2016-01-01
Supplement: c6tc03933b1.pdf [file c6tc03933b1.pdf]

**A Novel Garnet-based Cyan-emitting Phosphor  
Ca<sub>2</sub>LuHf<sub>2</sub>(AlO<sub>4</sub>)<sub>3</sub>:Ce<sup>3+</sup>: Synthesis, Structure and Photoluminescence  
Properties**

Xicheng Wang,<sup>ab</sup> Zhengyan Zhao,<sup>ab</sup> Quansheng Wu,<sup>ab</sup> Yanyan Li,<sup>ab</sup> and  
Yuhua Wang.<sup>ab,\*</sup>

<sup>a</sup>Key Laboratory for Special Function Materials and Structural Design of the  
Ministry of the Education,

<sup>b</sup>Department of Material Science, School of Physical Science and Technology,  
Lanzhou University, Lanzhou, 730000, China

**Corresponding Author**

\*E-mail: wyh@lzu.edu.cn

Tel.: +86-931-8912772 (office); Fax: +86-931-8913554 (office);

**Table S1. Detailed parameters for Rietveld refinement of CLHA crystal structure**

|                                                                                                                                   |                   |
|-----------------------------------------------------------------------------------------------------------------------------------|-------------------|
| Data collection                                                                                                                   |                   |
| Temperature (K)                                                                                                                   | 296(2)            |
| 2θ range (°)                                                                                                                      | 10 - 80           |
| step interval (°)                                                                                                                 | 0.02              |
| Counting time per step (s)                                                                                                        | 1                 |
| Reflection number                                                                                                                 | 104               |
| Refined parameters                                                                                                                |                   |
| Unit cell, background coefficients, zero shift, scale factor, profile coefficients,<br>spherical harmonics preferred orientation. |                   |
| Background function                                                                                                               | Shifted Chebyscev |
| Profile function                                                                                                                  | Pseudo Voigt      |
| R-factors                                                                                                                         |                   |
| S (R <sub>wp</sub> /R <sub>p</sub> )                                                                                              | 1.180             |
| R <sub>F</sub> <sup>2</sup>                                                                                                       | 0.080             |

**Table S2. Atomic coordinates and isotropic displacement parameters for CLHA**

| Atom | Wyckoff | S.O.F  | x           | y        | z          | Uiso       |
|------|---------|--------|-------------|----------|------------|------------|
| Ca   | 24c     | 0.6667 | 1/8         | 0        | 0          | 0.0384     |
| Lu   | 24c     | 0.3333 | 1/8         | 0        | 0          | 0.0384     |
| Hf   | 16a     | 1      | 0           | 0        | 0          | 0.0342(19) |
| Al   | 24d     | 1      | 1/8         | 0        | 3/4        | 0.012(7)   |
| O    | 96h     | 1      | -0.0252(17) | 0.055(4) | 0.1460(25) | 0.119(26)  |

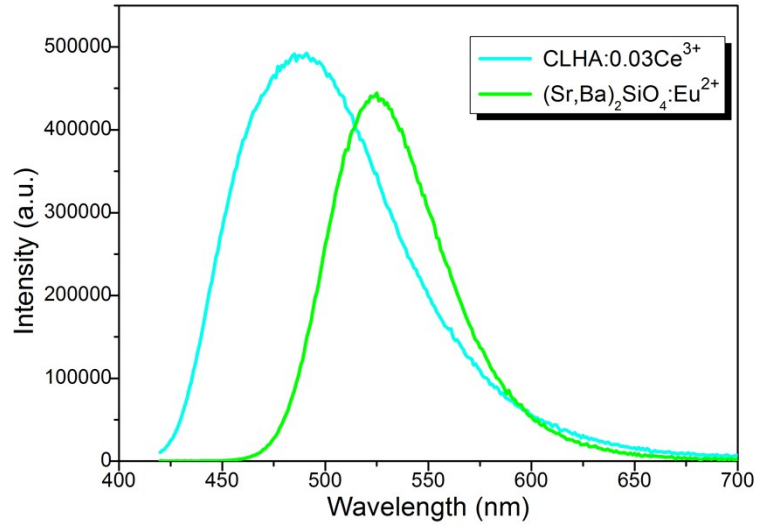

Figure S1. The emission spectra of CLHA:0.03Ce<sup>3+</sup> and commercial (Sr,Ba)<sub>2</sub>SiO<sub>4</sub>:Eu<sup>2+</sup>:Eu<sup>2+</sup> phosphor.

**Table S3. Luminescence properties of CLHA:Ce<sup>3+</sup> comparing with other analogues**

| Phosphor                                                                             | Emission peak(nm) | QE (%) | Intensity at 150°C(%) | Ref       |
|--------------------------------------------------------------------------------------|-------------------|--------|-----------------------|-----------|
| Ca <sub>2</sub> GdZr <sub>2</sub> (AlO <sub>4</sub> ) <sub>3</sub> :Ce <sup>3+</sup> | 500               | 40.26  | ~33                   | 23        |
| Ca <sub>2</sub> LaZr <sub>2</sub> Ga <sub>3</sub> O <sub>12</sub> :Ce <sup>3+</sup>  | 512               | 35.2   | ~30                   | 14        |
| Ca <sub>3</sub> Zr <sub>2</sub> SiGa <sub>2</sub> O <sub>12</sub> :Ce <sup>3+</sup>  | 478               | 42.7   | ~43                   | 24        |
| CLHA:Ce <sup>3+</sup>                                                                | 484               | 50.3   | 87                    | this work |
